# Supplementary material for: Combination of gelatin and tranexamic acid offers improved haemostasis and safe use on internal hemorrhage control
Source: Royal Society of Chemistry journal article supplement (doi:10.1039/c6ra16790j), 2016-01-01
Supplement: c6ra16790j1.pdf [file c6ra16790j1.pdf]

## **Combination of Gelatin and Tranexamic Acid Offers Improved Hemostasis and Safe Use on Internal Hemorrhage Control**

Umran Aydemir Sezer<sup>1</sup>, Zeynep Kocer<sup>2</sup>, Basak Aru<sup>3</sup>, Gulderen Yanikkaya Demirel<sup>3</sup>, Mehmet Gulmez<sup>4</sup>, Ali Aktekin<sup>4</sup>, Selvinaz Ozkara<sup>5</sup>, Serdar Sezer<sup>2,\*</sup>

<sup>1</sup>Materials Institute, TUBITAK Marmara Research Center, 41470 Kocaeli, Turkey

<sup>2</sup>Institute of Chemical Technology, TUBITAK Marmara Research Center, 41470 Kocaeli, Turkey

<sup>3</sup>Yeditepe University, School of Medicine, Department of Immunology, 34755, Istanbul, Turkey

<sup>4</sup>Department of Surgery, Haydarpasa Numune Education and Research Hospital, 34688 Istanbul, Turkey

<sup>5</sup>Department of Pathology, Haydarpasa Numune Education and Research Hospital, 34688 Istanbul, Turkey

**Supplementary Information**

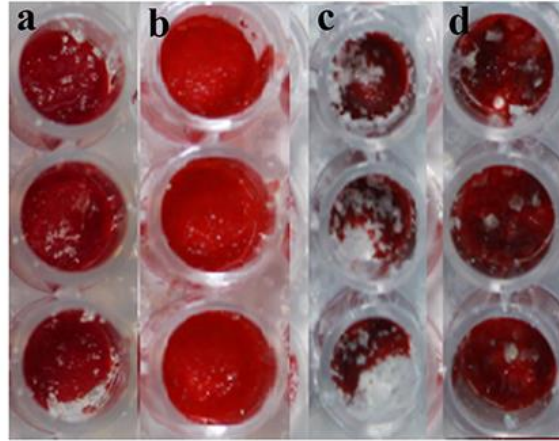

Supplementary Figure 1. Digital images of blood clots after contacting with (a) Gel, (b) Gel-TXA-Abs (c) Gel-TXA-Add and (d) Celox<sup>®</sup>.

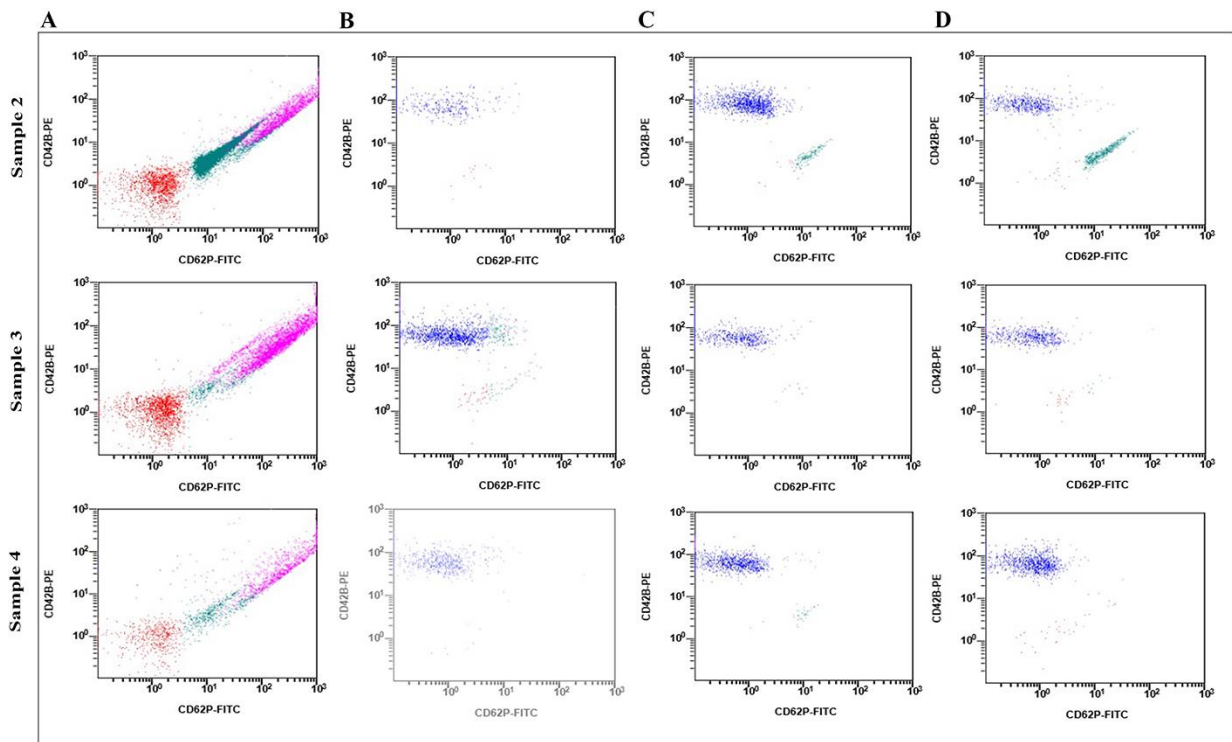

Supplementary Figure 2. Activation graph dot plots of three volunteers participated in this study. The materials are separated horizontally: (A) Celox<sup>®</sup>, (B) Control (without contacting with any material), (C) Gel and (D) Gel-TXA-Abs groups. Sample represents blood of volunteer.

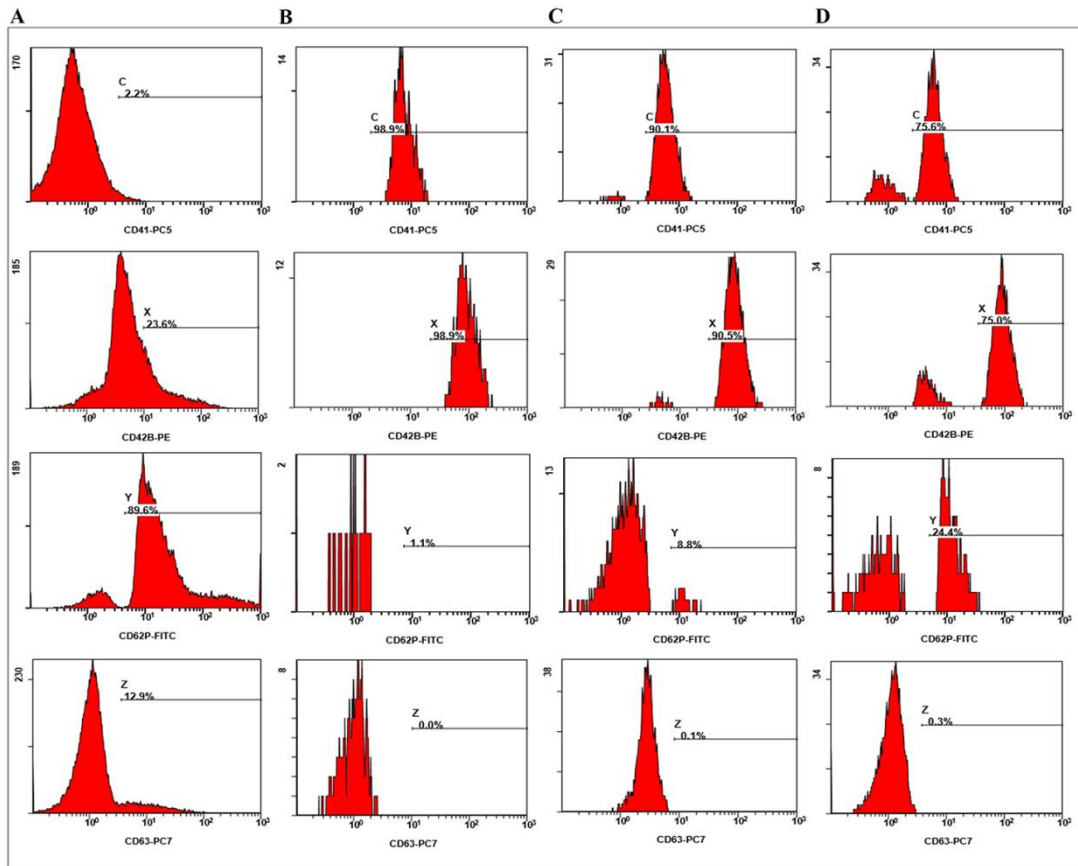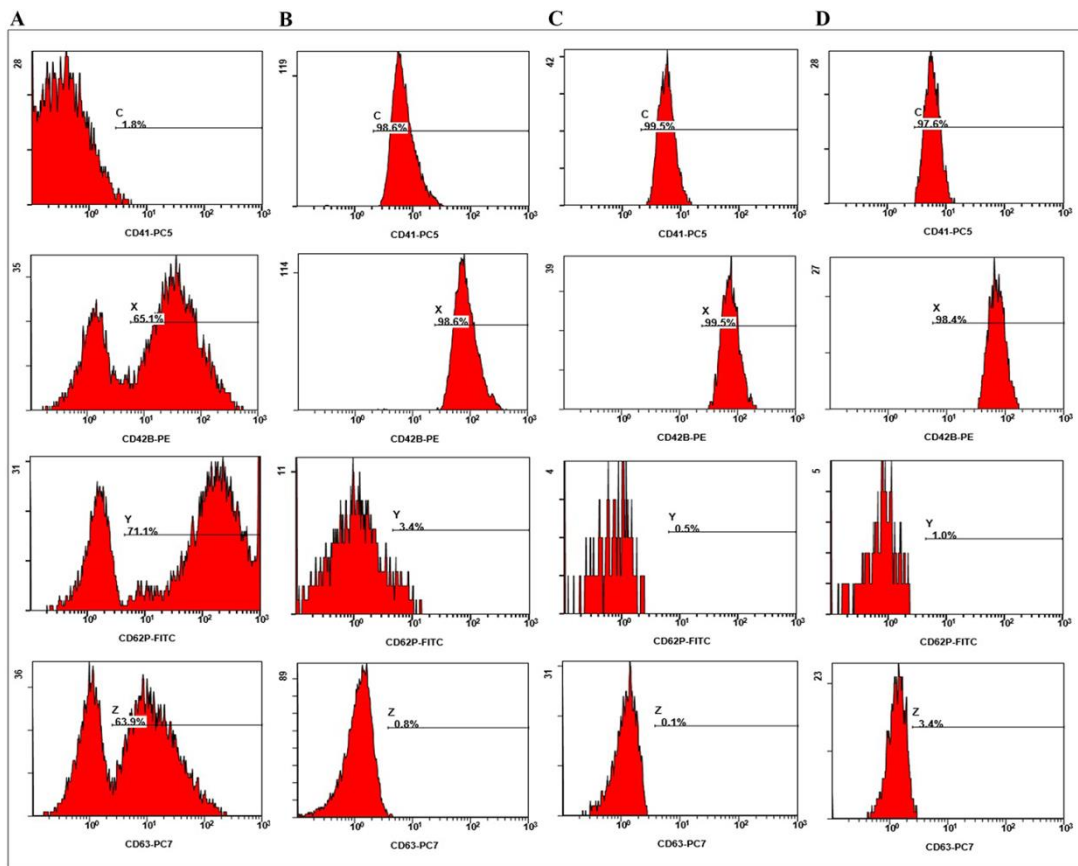

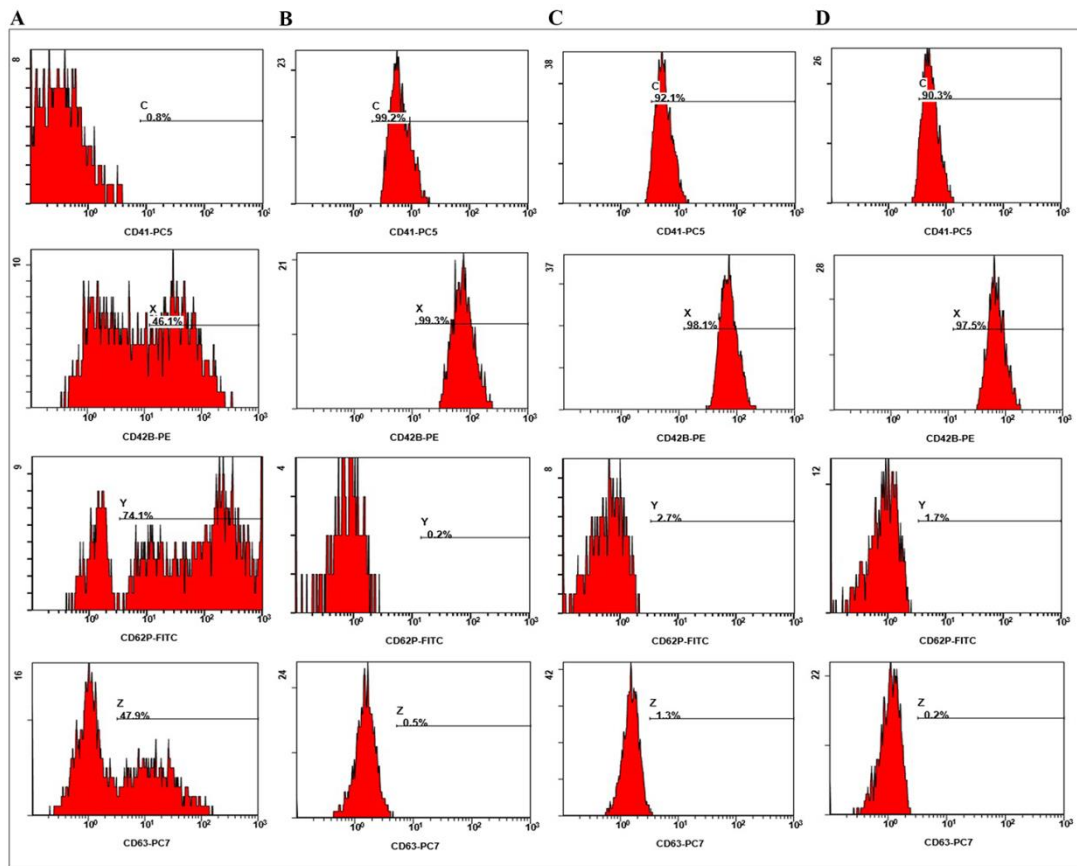

Supplementary Figure 3. Activation graphs of CD41, CD63, CD62P, and CD42B after contacting of blood from volunteers. The materials are separated horizontally: (A) Celox<sup>®</sup>, (B) Control (without contacting with any material), (C) Gel and (D) Gel-TXA-Abs groups.
